# Supplementary material for: The PANI-DBSA content and dispersing solvent as influencing parameters in sensing performances of TiO2/PANI-DBSA hybrid nanocomposites to ammonia
Source: Royal Society of Chemistry journal article supplement (doi:10.1039/c6ra12693f), 2016-01-01
Supplement: c6ra12693f1.pdf [file c6ra12693f1.pdf]

## Supporting Information to:

### The PANI-DBSA content and dispersing solvent as influence parameters in sensing performances of TiO<sub>2</sub>/PANI-DBSA hybrid nanocomposites to ammonia

S. Mikhaylov<sup>a,b</sup>, N.A. Ogurtsov<sup>a</sup>, N. Redon<sup>b</sup>, P. Coddeville<sup>b</sup>,  
J-L. Wojkiewicz<sup>b\*</sup> and A.A. Pud<sup>a\*</sup>

<sup>a</sup> Institute of Bioorganic Chemistry and Petrochemistry, National Academy of Sciences of Ukraine, 50 Kharkovske Shose, 02160, Kyiv, Ukraine.

<sup>b</sup> Mines Douai, Département Sciences de l'Atmosphère et Génie de l'Environnement (SAGE), 941 rue Charles Bourseul, F-59508 Douai, France.

\* Corresponding authors; E-Mail: [jean-luc.wojkiewicz@mines-douai.fr](mailto:jean-luc.wojkiewicz@mines-douai.fr), Tel.: + 03 27 71 23 33;  
[alexander.pud@gmail.com](mailto:alexander.pud@gmail.com)/[pud@bpci.kiev.ua](mailto:pud@bpci.kiev.ua), Tel.: +38 044 559 70 03.

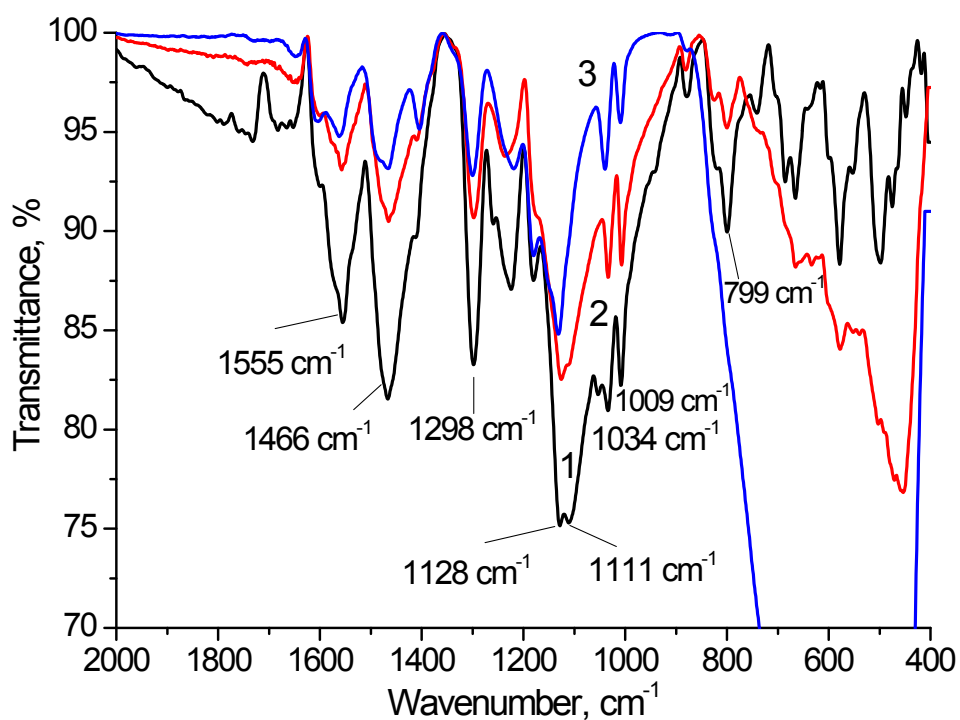

**Figure S1.** FTIR spectra of PANI-DBSA (1) and TiO<sub>2</sub>/PANI-DBSA nanocomposites NC36 (2) and NC9 (3).

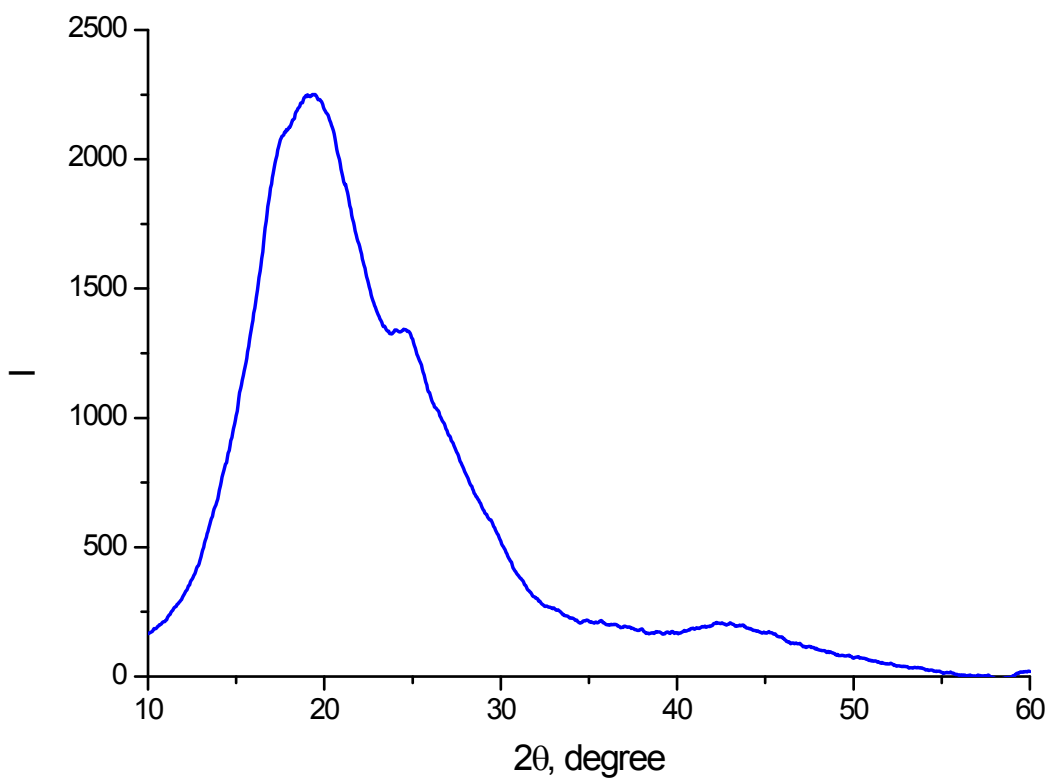

**Figure S2.** XRD pattern of the pure PANI-DBSA. Simple 5-point smoothing and background subtraction with a linear function were applied here.

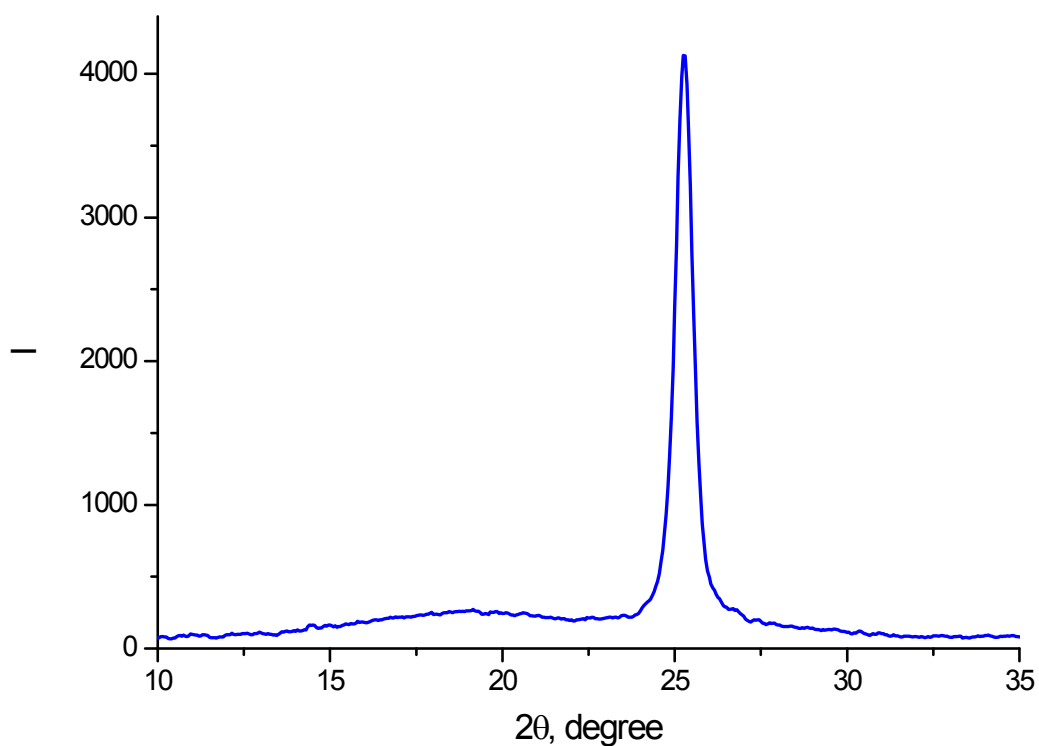

**Figure S3.** XRD pattern of NC36 nanocomposite. Simple 5-point smoothing and background subtraction with a linear function were applied here.

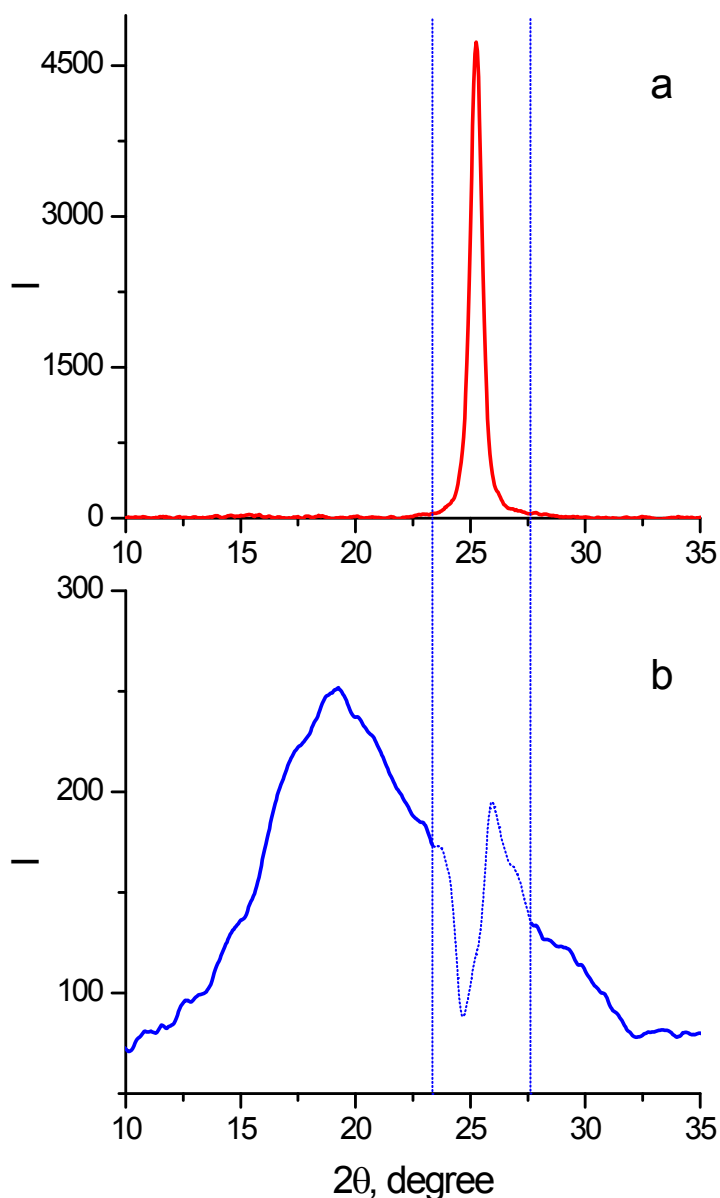

**Figure S4.** (a) XRD pattern of TiO<sub>2</sub>. Simple 5-point smoothing and background subtraction with a linear function were applied here. (b) The difference XRD pattern of the PANI phase of NC36 nanocomposite obtained by subtraction of the TiO<sub>2</sub> pattern from the NC36 one. Simple 25-point smoothing protocol was applied here. Before the subtraction procedure the TiO<sub>2</sub> peak height at 25.3° in XRD pattern of the NC36 nanocomposite was normalized to its height in XRD pattern of TiO<sub>2</sub>.

Although, the difference pattern displays pronounced shoulders at 15.1°, 17.4°, and 29.1° that can be assigned to PANI-DBSA features (see the paper text), its part in the range from 23,4° to 27,6° has large errors because of its low intensity, and, therefore, should not be taken into account.

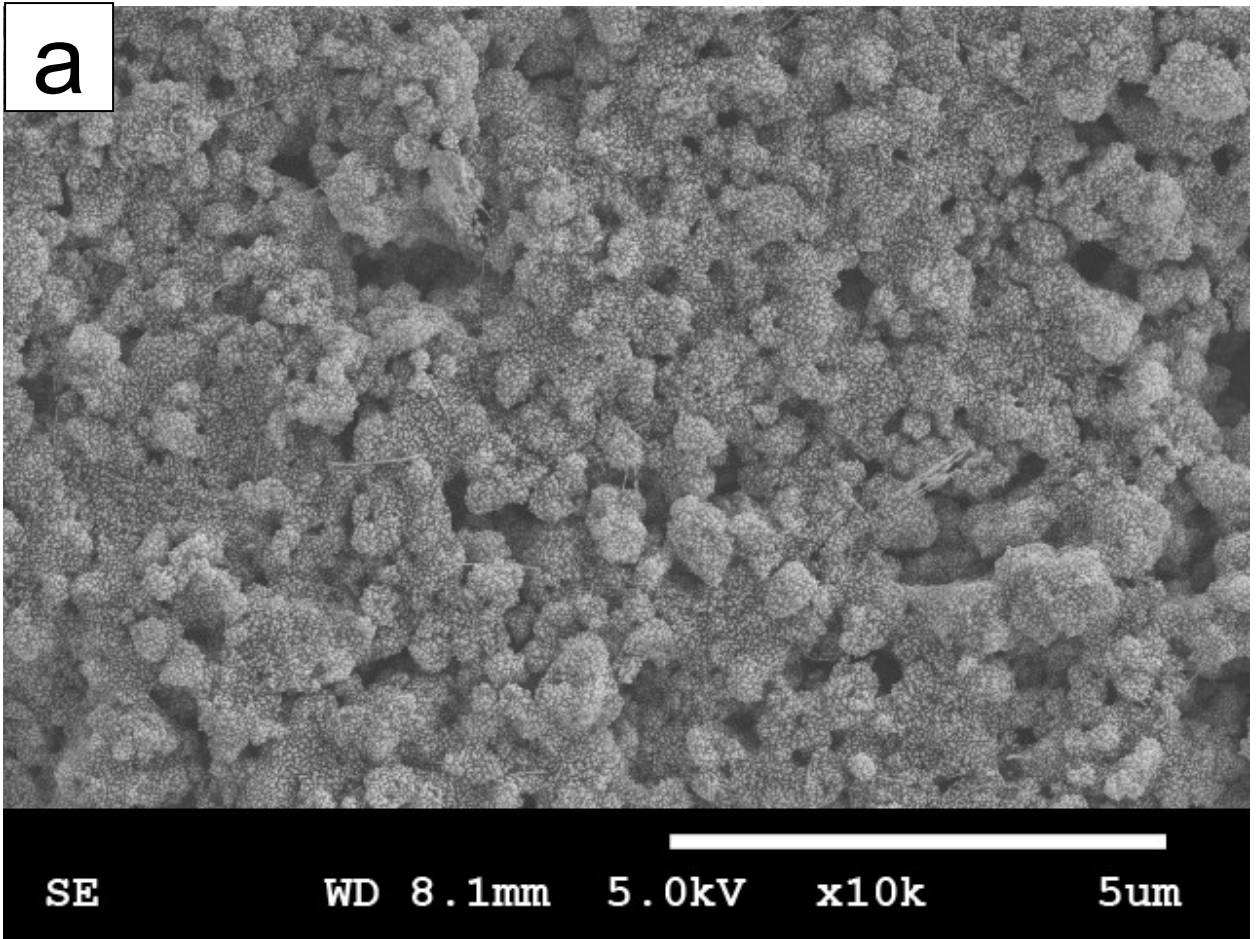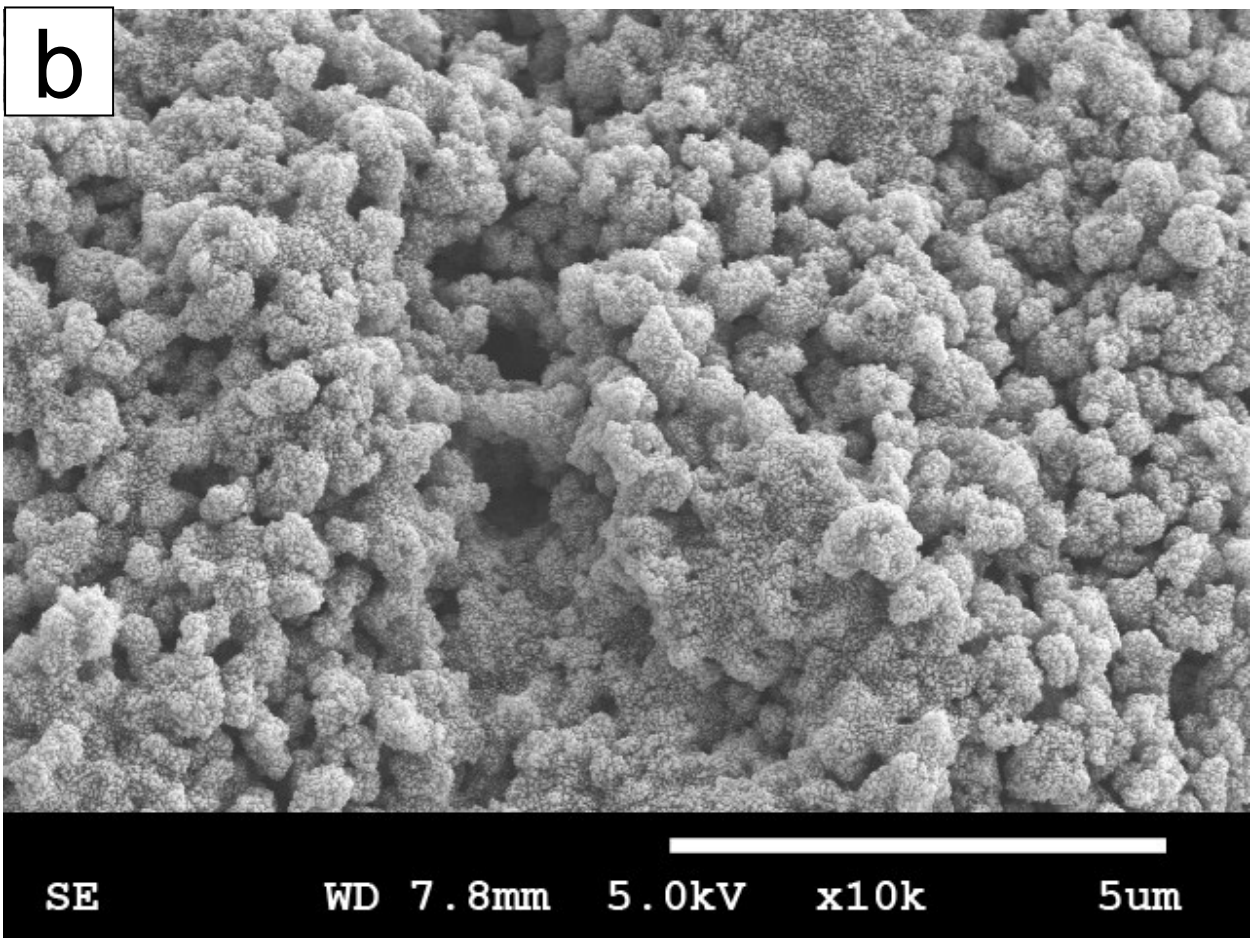

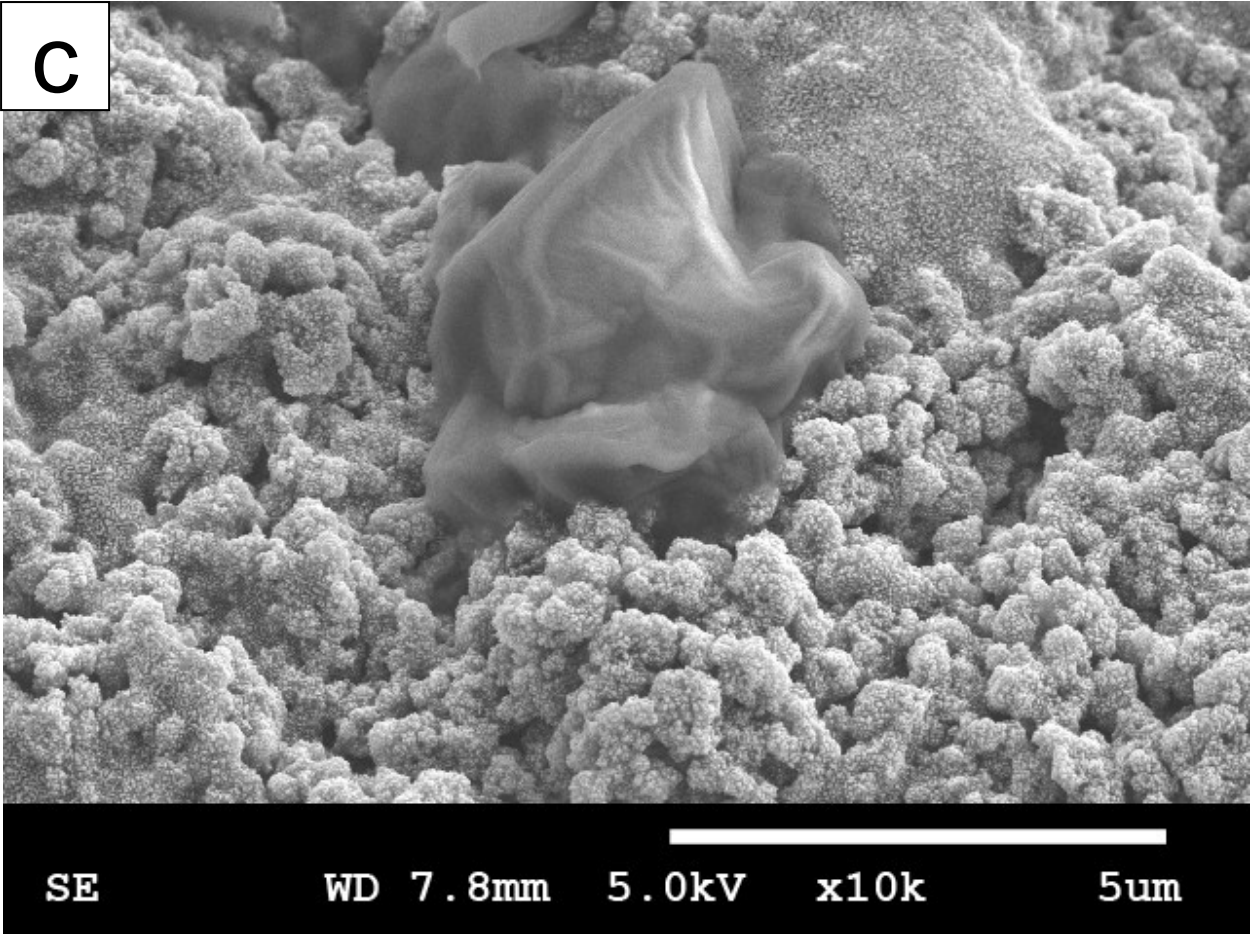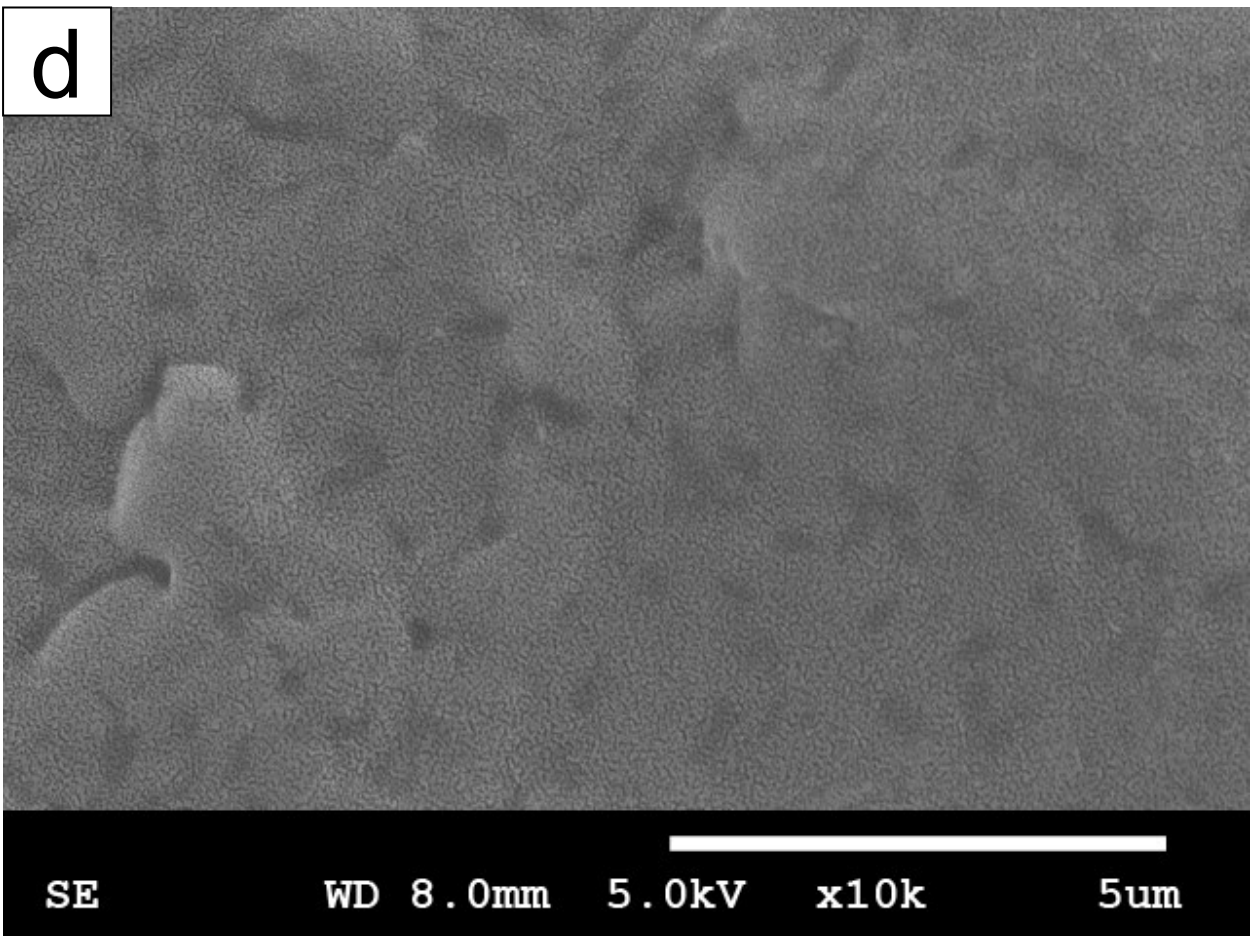

e

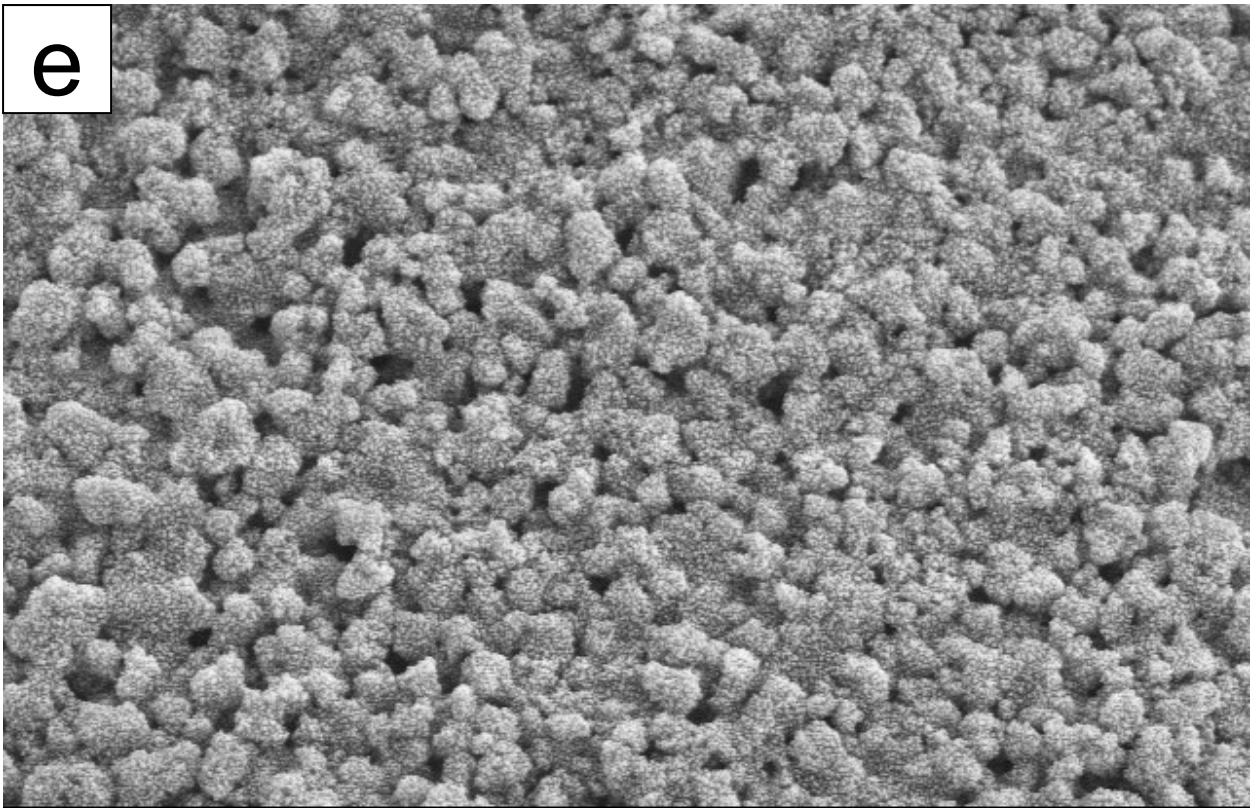

SE

WD 8.2mm

5.0kV

x10k

5um

f

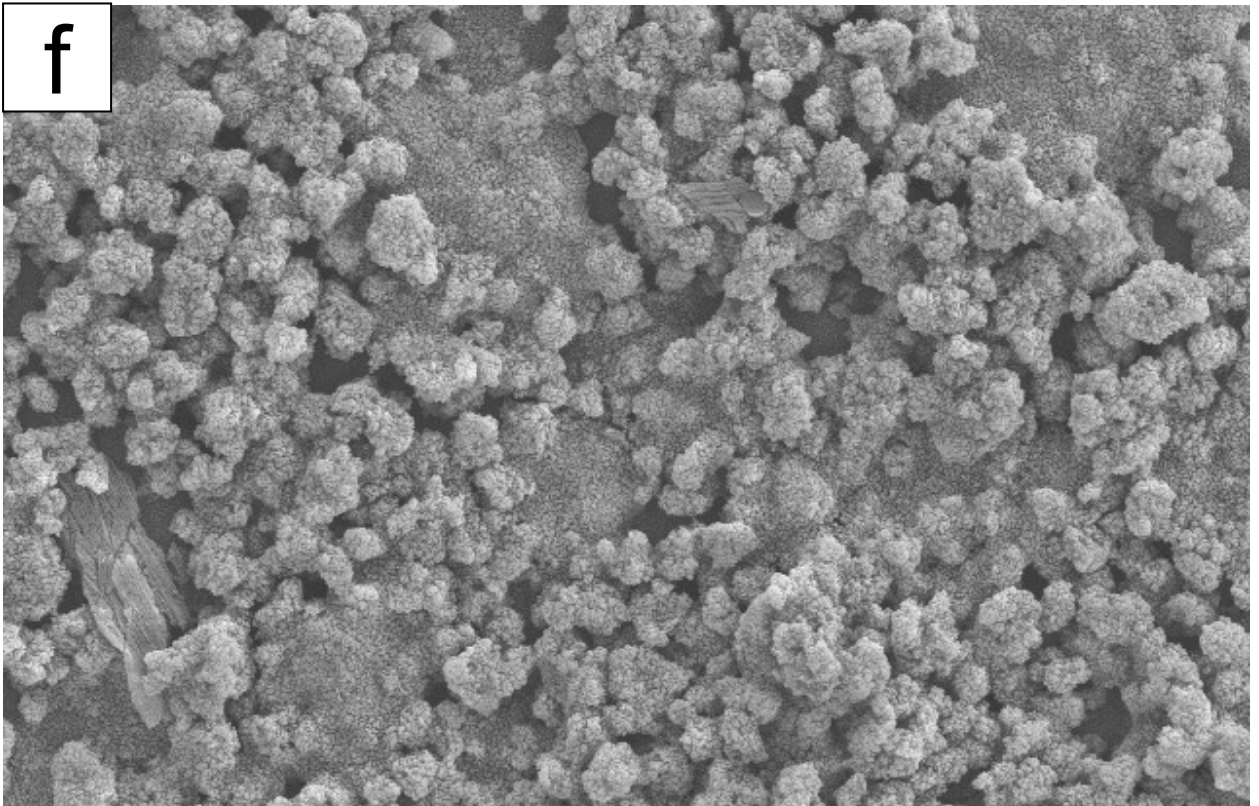

SE

WD 7.9mm

5.0kV

x10k

5um

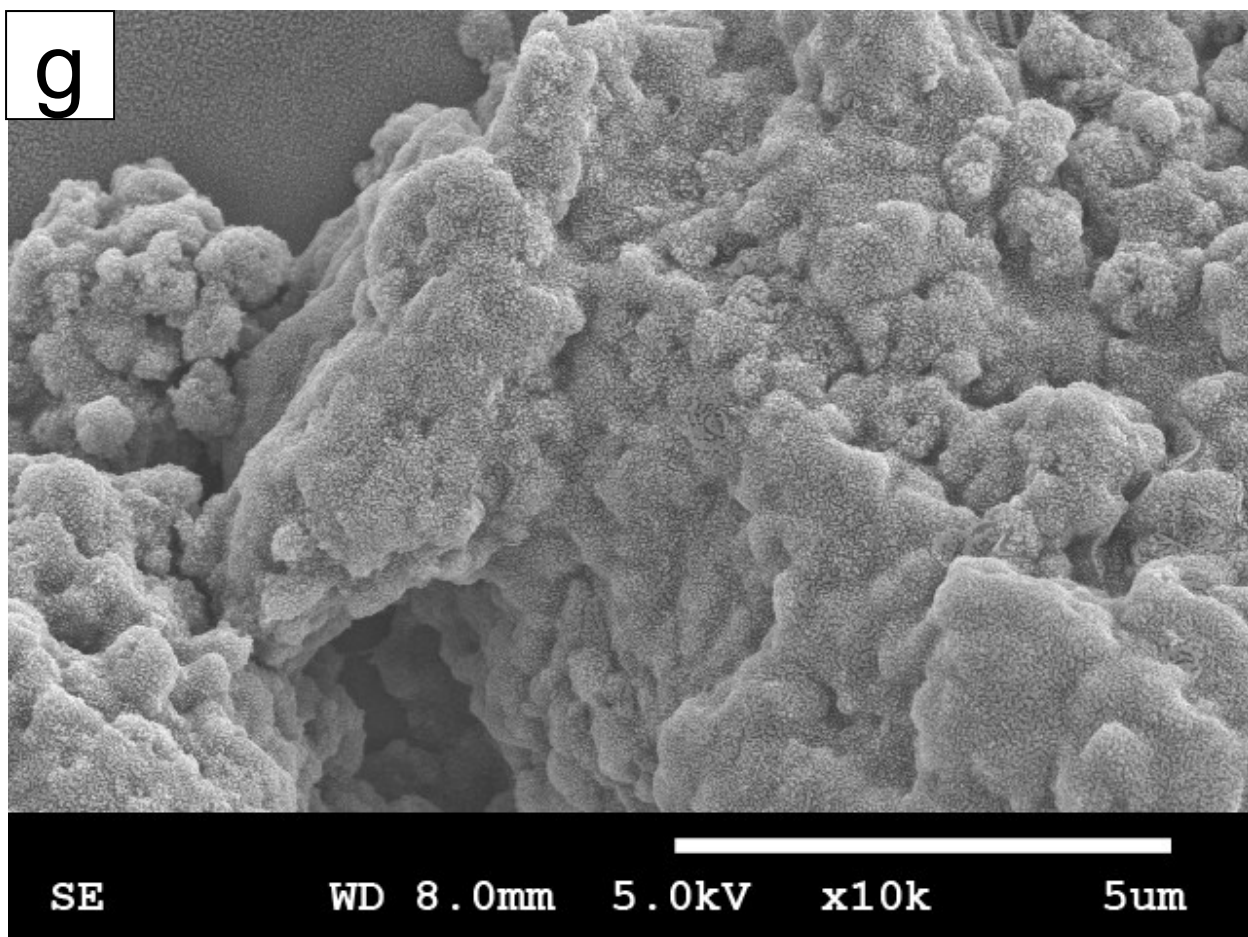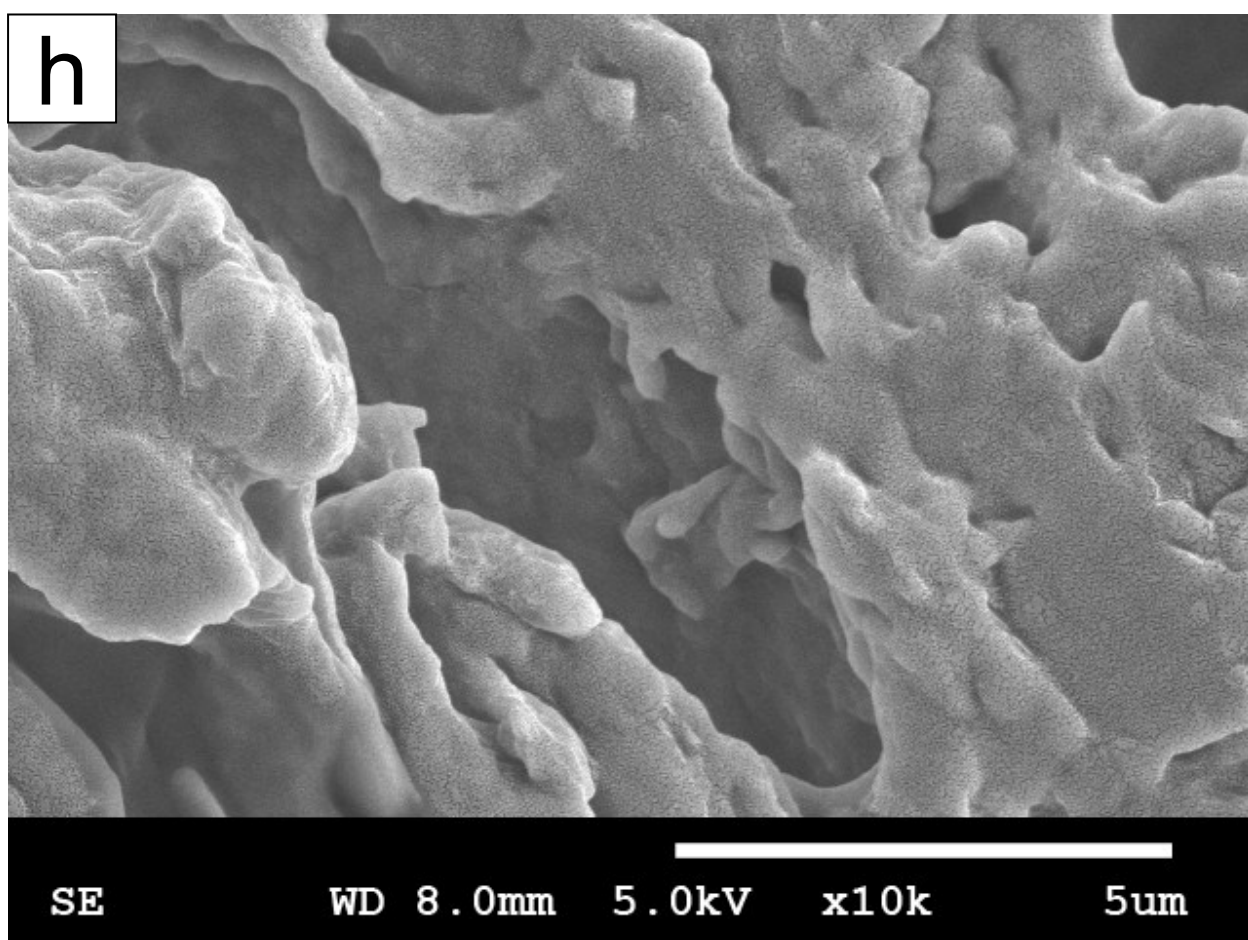

**Figure S5.** Enlarged SEM images
